# Supplementary material
Source: PubMed Central journal article supplement (PMC3060947)
Supplement: NIHMS274095-supplement-06.pdf [file NIHMS274095-supplement-06.pdf]

| Day                                      | 0     | 2     | 4     | 6   | 8         | 10    | 12   | 14    | 16        | Tumors |
|------------------------------------------|-------|-------|-------|-----|-----------|-------|------|-------|-----------|--------|
| <b>7.5 ug/inj Anti-Cx46 siRNA</b>        |       |       |       |     |           |       |      |       |           |        |
| <b>Cage 1</b>                            |       |       |       |     |           |       |      |       |           |        |
| 1                                        | 137.5 | 137.5 | 125   | 150 | 318.5 (E) | -     | -    | -     | -         | *      |
| 2                                        | NT    | 162   | 245   | 245 | 234 (E)   | -     | -    | -     | -         | *      |
| <b>15 ug/inj Anti-Cx46 siRNA</b>         |       |       |       |     |           |       |      |       |           |        |
| <b>Cage 2</b>                            |       |       |       |     |           |       |      |       |           |        |
| 3                                        | NT    | NT    | 80    | 198 | 269.5 (E) | -     | -    | -     | -         | *      |
| 4                                        | 216   | 137.5 | 198   | 80  | 343 (E)   | -     | -    | -     | -         | *      |
| <b>30 ug/inj Anti-Cx46 siRNA</b>         |       |       |       |     |           |       |      |       |           |        |
| <b>Cage 3</b>                            |       |       |       |     |           |       |      |       |           |        |
| 5                                        | 27    | 112.5 | 64    | 56  | 27        | 22.5  | 22.5 | 27    | 27 (E)    | *      |
| 6                                        | 72    | 180   | 80    | 80  | 80        | 72    | 64   | 64    | 56 (E)    | *      |
| <b>7.5 ug/Inj Negative Control siRNA</b> |       |       |       |     |           |       |      |       |           |        |
| <b>Cage 4</b>                            |       |       |       |     |           |       |      |       |           |        |
| 7                                        | 216   | 180   | 216   | 294 | 318.5     | 318.5 | 416  | 448   | 448 (E)   | *      |
| 8                                        | NT    | 137.5 | 137.5 | 180 | 198       | 269.5 | 245  | 269.5 | 269.5 (E) | *      |

**Table S1. Calculated volumes (cubic mm) of individual xenograft tumors used the proof-of-concept and dosage pilot study.**

| Day                           | 1    | 2    | 4    | 6     | 8     | 10    | 12    | 14    | 16    | 18     | 20       | 22       | 24        | FINAL TV | Average | WB |
|-------------------------------|------|------|------|-------|-------|-------|-------|-------|-------|--------|----------|----------|-----------|----------|---------|----|
| <b>Anti-Cx46 siRNA</b>        |      |      |      |       |       |       |       |       |       |        |          |          |           |          |         |    |
| <b>Cage 1</b>                 |      |      |      |       |       |       |       |       |       |        |          |          |           |          |         |    |
| 1                             | NT   | NT   | NT   | NT    | 6     | 56    | 180   | 288   | 445.5 | 600    | 936      | 1862 (E) | -         | 3450     |         |    |
| 2                             | NT   | NT   | NT   | 6     | 48    | 22.5  | 8     | 40    | 62.5  | 56     | 64       | 144      | 269.5 (E) | 288      |         |    |
| 3                             | 8    | 22.5 | 27   | 87.5  | 100   | 100   | 100   | 125   | 198   | 343    | 480 (E)  | -        | -         | 544      |         |    |
| <b>Cage 2</b>                 |      |      |      |       |       |       |       |       |       |        |          |          |           |          |         |    |
| 1                             | 6    | 8    | 6    | 18    | 87.5  | 48    | 32    | 32    | 40    | 32     | 32 (E)   | -        | -         | 80       |         |    |
| 2                             | 10   | 48   | 100  | 125   | 112.5 | 87.5  | 87.5  | 100   | 100   | 87.5   | 87.5 (E) | -        | -         | 198      |         | *  |
| 3                             | NT   | NT   | NT   | 48    | 100   | 48    | 56    | 48    | 108   | 72     | 48       | 162      | 320 (E)   | 324      |         |    |
| <b>Negative Control siRNA</b> |      |      |      |       |       |       |       |       |       |        |          |          |           |          |         |    |
| <b>Cage 3</b>                 |      |      |      |       |       |       |       |       |       |        |          |          |           |          |         |    |
| 1                             | 22.5 | 48   | 87.5 | 196   | 196   | 196   | 256   | 288   | 364.5 | 445.5  | 486 (E)  | -        | -         | 462      |         |    |
| 2                             | NT   | NT   | 22.5 | 56    | 87.5  | 22.5  | 22.5  | 18    | 22.5  | 27     | 87.5     | 144 (E)  | -         | 168      |         |    |
| 3                             | NT   | NT   | NT   | 100   | 112.5 | 320   | 600   | 600   | 600   | 847    | 1470 (E) | -        | -         | 1620     |         |    |
| <b>Cage 4</b>                 |      |      |      |       |       |       |       |       |       |        |          |          |           |          |         |    |
| 1                             | NT   | NT   | NT   | 22.5  | 27    | 36    | 31.5  | 36    | 150   | 294    | 318.5    | 416      | 688.5 (E) | 720      |         |    |
| 2                             | NT   | NT   | NT   | 40    | 144   | 125   | 216   | 448   | 729   | 950    | 1210 (E) | -        | -         | 1144     |         | *  |
| 3                             | NT   | NT   | NT   | 27    | 27    | 27    | 72    | 36    | 87.5  | 125    | 137.5    | 294      | 480 (E)   | 520      |         |    |
| <b>Sham-No siRNA</b>          |      |      |      |       |       |       |       |       |       |        |          |          |           |          |         |    |
| <b>Cage 5</b>                 |      |      |      |       |       |       |       |       |       |        |          |          |           |          |         |    |
| 1                             | NT   | NT   | NT   | NT    | NT    | NT    | NT    | 22.5  | 48    | NT     | 125      | 252      | 367.5 (E) | 450      |         |    |
| 2                             | NT   | 8    | 22.5 | 56    | 100   | 196   | 162   | 180   | 384   | 750    | 1152 (E) | -        | -         | 1360     |         | *  |
| 3                             | NT   | NT   | NT   | 27    | 31.5  | 72    | 269.5 | 294   | 650   | 1267.5 | 1352     | 1521 (E) | -         | 1296     |         |    |
| <b>Cage 6</b>                 |      |      |      |       |       |       |       |       |       |        |          |          |           |          |         |    |
| 1                             | NT   | 31.5 | 64   | 112.5 | 100   | 112.5 | 125   | 294   | 416   | 800    | 1152 (E) | -        | -         | 1456     |         |    |
| 2                             | NT   | 56   | 72   | 80    | 125   | 125   | 234   | 112.5 | 220.5 | 607.5  | 1296 (E) | -        | -         | 1365     |         |    |
| 3                             | NT   | NT   | 22.5 | 64    | 112.5 | 100   | 245   | 269.5 | 245   | 448    | 526.5    | 567 (E)  | -         | 480      |         |    |

**Table S2. Calculated volumes (cubic mm) of individual xenograft tumors used in the primary study.**
